# Supplementary material for: Phase 2 Trial (POLA Study) of Lurbinectedin plus Olaparib in Patients with Advanced Solid Tumors: Results of Efficacy, Tolerability, and the Translational Study
Source: MDPI journal article supplement (doi:10.3390/cancers14040915), 2022-02-12

## **Manuscript Supplementary Material**

Title:

**Phase II trial (POLA study) to evaluate the efficacy and tolerability of lurbinectedin plus olaparib in patients with advanced solid tumors: results from the translational study**

Authors:

Andres Poveda, Raquel Lopez-Reig, Ana Oaknin, Andres Redondo, Maria Jesus Rubio, Eva Guerra, Lorena Fariñas-Madrid, Alejandro Gallego, Victor Rodriguez-Freixinos, Antonio Fernandez-Serra, Oscar Juan, Ignacio Romero, Jose A Lopez-Guerrero

**Corresponding author:**

**Andres Poveda, MD**

<sup>1</sup> Oncogynecologic Department, Initia Oncology, Hospital Quironsalud Avda Blasco Ibañez, 14, 46 010-Valencia, Spain. E-mail: [apoveda@initiaoncologia.com](mailto:apoveda@initiaoncologia.com)

## Table of Contents

|                                                                                                                                                                                                                                                     |    |
|-----------------------------------------------------------------------------------------------------------------------------------------------------------------------------------------------------------------------------------------------------|----|
| <b>Supplementary Materials and Methods</b> .....                                                                                                                                                                                                    | 3  |
| Mutation-based classification: HRD status.....                                                                                                                                                                                                      | 3  |
| CN patterns comparison between cancer type.....                                                                                                                                                                                                     | 3  |
| Assessing CN amplification and losses at gene level. ....                                                                                                                                                                                           | 3  |
| <b>Table S1. Best overall response rate by tumor type</b> .....                                                                                                                                                                                     | 3  |
| <b>Figure S1.</b> Consort diagram. ....                                                                                                                                                                                                             | 5  |
| <b>Figure S2.</b> .....                                                                                                                                                                                                                             | 6  |
| A. Kaplan-Meier curves for the whole population .....                                                                                                                                                                                               | 6  |
| B. Kaplan-Meier curves of progression-free survival according to histology (ovarian vs. endometrium).....                                                                                                                                           | 7  |
| C. Swimmer plot of progression-free survival by tumor type .....                                                                                                                                                                                    | 7  |
| <b>Figure S3.</b> .....                                                                                                                                                                                                                             | 9  |
| A. Kaplan-Meier curves of Overall survival for the whole population.....                                                                                                                                                                            | 9  |
| B. Kaplan-Meier curves of Overall survival according to histology (ovarian vs. endometrium) .....                                                                                                                                                   | 10 |
| <b>Figure S4:</b> Comparison of GI patterns between cancer types. A) Total number of events( $d=0.67$ ), B) Total number of gains( $d=0.76$ ), and C) Total number of losses ( $d=0.54$ ),. Non-parametric Wilcoxon Signed Ranks Test was used..... | 11 |
| <b>Figure S5:</b> Clinical implication of GI parameters regarding ORR in A) Global population ( $d=0.84$ ), B) EC population ( $d=0.34$ ), Non-parametric Wilcoxon Signed Ranks Test was used. ....                                                 | 11 |
| <b>Figure S6:</b> Clinical implication of GI parameters in OC population regarding CBR. A) Total number of events ( $d=0.62$ ), and B) total number of gains ( $d=0.69$ ). Non-parametric Wilcoxon Signed Ranks Test was used.....                  | 12 |

## Supplementary Materials and Methods

Mutation-based classification: HRD status

*For gene-based HRD status classification, genes that were considered to assign a patient as HRD were: BRCA1, BRCA2, BARD1, BRIP1, CHEK1, CHEK2, FAM175A, NBN, PALB2, ATM, MRE11A, RAD51B, RAD51C, RAD51D, RAD54L, SLX4, WRN, ATR.*

CN patterns comparison between cancer type

When comparing EC and OC cohorts, differences at global GI ( $p=0.032$ ) as well as at gains ( $p=0.0046$ ) and losses ( $p=0.022$ ) appeared. However, LOH events neither percentage of altered genome showed significant statistical differences. In all cases, OC population presented higher number of GI, both globally and parameter-dependent (S5).

Assessing CN amplification and losses at gene level.

In addition to the GI profiling, a custom panel was also designed to interrogate CN at gene level. Since *PTEN* loss and *EMSY* and *CCNE1* amplification have been described in these tumor types, the panel was reinforced in these regions with more probes. Hence, CN data analyzed by panel mops package were used. A total of 6 and 1 amplification were detected in *CCNE1* and *EMSY*, respectively, while 5 patients presented *PTEN* loss among the EC population. Concerning *CCNE1* amplifications, 4 were found in EC and 2 in OC, any of them coinciding with HRR mutation, being mutually exclusive. *PTEN* was also found in the two subpopulations, 2 events in EC and 3 in OC. These alterations were validated by MLPA, the gold standard technique, to assess CN at gene level. While amplification was confirmed in all cases, the validation of *PTEN* loss was not possible. Cases harboring these alterations have not shown correlation with response to PARPi. Additionally, a subanalysis stratifying OC patients according to the presence of *CCNE1* amplification, HRR mutation or none of them was performed, also lacking significant results.

**Table S1. Best overall response rate by tumor type**

|                     | Tumor type                           |      |                               |      |
|---------------------|--------------------------------------|------|-------------------------------|------|
|                     | Ovary <sup>1</sup> (N = 46 patients) |      | Endometrium (N = 26 patients) |      |
|                     | N                                    | %    | N                             | %    |
| Complete Response   | 0                                    | 0    | 1                             | 3.8  |
| Partial Response    | 3                                    | 6.5  | 3                             | 11.5 |
| Stable Disease      | 31                                   | 67.4 | 14                            | 53.8 |
| Progressive Disease | 8                                    | 17.4 | 7                             | 26.9 |
| NO Evaluable        | 4                                    | 8.7  | 1                             | 3.8  |

<sup>1</sup>Ovarian, fallopian tube and primary peritoneum tumors

Best Overall Response defined as the best response presented according to RECIST 1.1 criteria during the treatment period

**Table S2. Long-term responders**

| Patient ID | PFS Evaluation (Censored YES/NO) | Response Assessment |           | Long-Time Responder |
|------------|----------------------------------|---------------------|-----------|---------------------|
|            |                                  | PFS Event           | PFS time  |                     |
| 01001      | No                               | Progression         | 1.3479452 | No                  |
| 01002      | No                               | Progression         | 2.5972603 | No                  |
| 01003      | No                               | Progression         | 1.2164384 | No                  |
| 01004      | No                               | Progression         | 4.6027397 | No                  |
| 01005      | No                               | Progression         | 4.3726027 | No                  |
| 01006      | No                               | Progression         | 13.347945 | Yes                 |
| 01008      | No                               | Progression         | 1.3808219 | No                  |
| 02001      | No                               | Progression         | 5.5890411 | No                  |
| 02003      | No                               | Progression         | 2.1369863 | No                  |
| 02004      | No                               | Progression         | 5.1287671 | No                  |
| 02005      | Yes                              | .                   | 0.0328767 | No                  |
| 02006      | Yes                              | .                   | 1.6767123 | No                  |
| 02007      | No                               | Progression         | 9.9287671 | Yes                 |
| 02008      | No                               | Progression         | 7.5287671 | No                  |
| 02009      | No                               | Progression         | 5.9506849 | No                  |
| 02010      | No                               | Progression         | 9.5342466 | Yes                 |
| 02011      | Yes                              | .                   | 23.243836 | Yes                 |
| 02012      | No                               | Progression         | 19.364384 | Yes                 |
| 02013      | No                               | Progression         | 4.8       | No                  |
| 02014      | No                               | Progression         | 4.5369863 | No                  |
| 02015      | No                               | Progression         | 2.7616438 | No                  |
| 02016      | No                               | Progression         | 12.09863  | Yes                 |
| 02017      | No                               | Progression         | 2.5643836 | No                  |
| 02018      | No                               | Progression         | 5.5561644 | No                  |
| 02019      | No                               | Death               | 17.687671 | Yes                 |
| 02020      | No                               | Progression         | 5.030137  | No                  |
| 02021      | No                               | Progression         | 1.7753425 | No                  |
| 02023      | No                               | Progression         | 6.1808219 | No                  |
| 02024      | No                               | Progression         | 1.6109589 | No                  |
| 02025      | Yes                              | .                   | 0.0328767 | No                  |
| 02026      | No                               | Progression         | 6.1150685 | No                  |
| 03001      | No                               | Progression         | 1.5123288 | No                  |
| 03002      | No                               | Progression         | 6.8712329 | No                  |
| 03004      | No                               | Progression         | 3.6821918 | No                  |
| 03005      | Yes                              | .                   | 1.8410959 | No                  |
| 03006      | No                               | Progression         | 1.8410959 | No                  |
| 03007      | Yes                              | .                   | 8.6136986 | No                  |
| 03008      | No                               | Progression         | 1.6767123 | No                  |
| 03009      | No                               | Progression         | 1.9068493 | No                  |
| 03010      | No                               | Progression         | 1.5780822 | No                  |
| 03011      | No                               | Progression         | 3.0246575 | No                  |
| 03013      | No                               | Progression         | 1.8410959 | No                  |
| 03014      | Yes                              | .                   | 15.978082 | Yes                 |
| 03015      | No                               | Progression         | 9.3041096 | Yes                 |
| 03016      | No                               | Progression         | 2.8931507 | No                  |
| 03017      | No                               | Progression         | 4.6027397 | No                  |
| 03018      | No                               | Progression         | 4.569863  | No                  |
| 03019      | No                               | Progression         | 4.1753425 | No                  |
| 04001      | No                               | Progression         | 3.0575342 | No                  |
| 04003      | No                               | Progression         | 3.4191781 | No                  |
| 04004      | No                               | Progression         | 2.9260274 | No                  |
| 04005      | No                               | Progression         | 2.9260274 | No                  |
| 04006      | No                               | Progression         | 1.4465753 | No                  |
| 04008      | No                               | Progression         | 6.9369863 | No                  |
| 04009      | No                               | Progression         | 9.7315068 | Yes                 |
| 04010      | Yes                              | .                   | 0.0328767 | No                  |
| 04011      | No                               | Progression         | 1.3150685 | No                  |
| 04013      | No                               | Progression         | 6.8054795 | No                  |
| 04014      | Yes                              | .                   | 0.0328767 | No                  |
| 04015      | No                               | Progression         | 1.4465753 | No                  |
| 05003      | No                               | Progression         | 5.2931507 | No                  |
| 05005      | No                               | Progression         | 2.9917808 | No                  |
| 05006      | No                               | Progression         | 12.953425 | Yes                 |
| 05007      | No                               | Progression         | 4.2082192 | No                  |
| 05008      | No                               | Progression         | 5.7534247 | No                  |
| 05009      | No                               | Death               | 1.7424658 | No                  |
| 05010      | No                               | Progression         | 4.6684932 | No                  |
| 05011      | No                               | Progression         | 1.5780822 | No                  |
| 05012      | No                               | Progression         | 5.9835616 | No                  |
| 05013      | No                               | Progression         | 3.2219178 | No                  |

| Patient ID | PFS Evaluation<br>(Censored YES/NO) | Response Assessment |           |                     |
|------------|-------------------------------------|---------------------|-----------|---------------------|
|            |                                     | PFS Event           | PFS time  | Long-Time Responder |
| 05014      | No                                  | Progression         | 2.9589041 | No                  |
| 05015      | No                                  | Progression         | 5.5561644 | No                  |
| 05016      | Yes                                 | .                   | 9.1726027 | Yes                 |

Long term responders defined as those patients whose PFS is greater-equal the double estimated median PFS :4.54

**Figure S1.** Consort diagram.

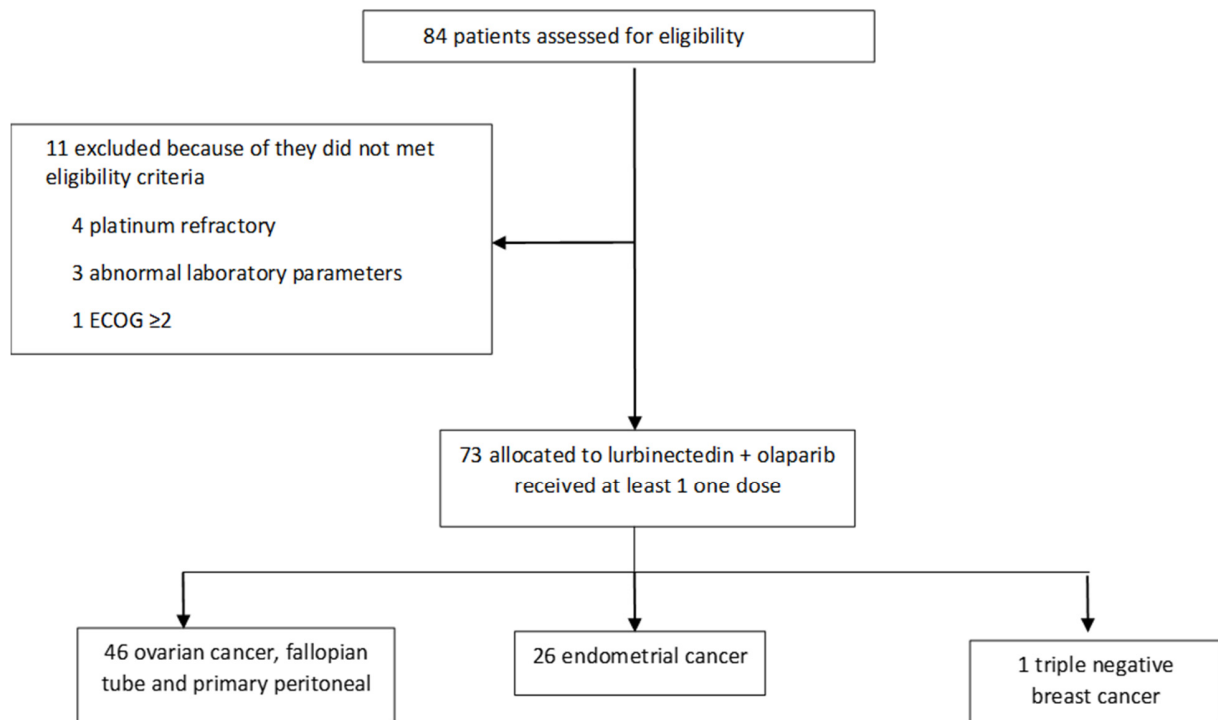

**Figure S2.**

A. Kaplan-Meier curves for the whole population

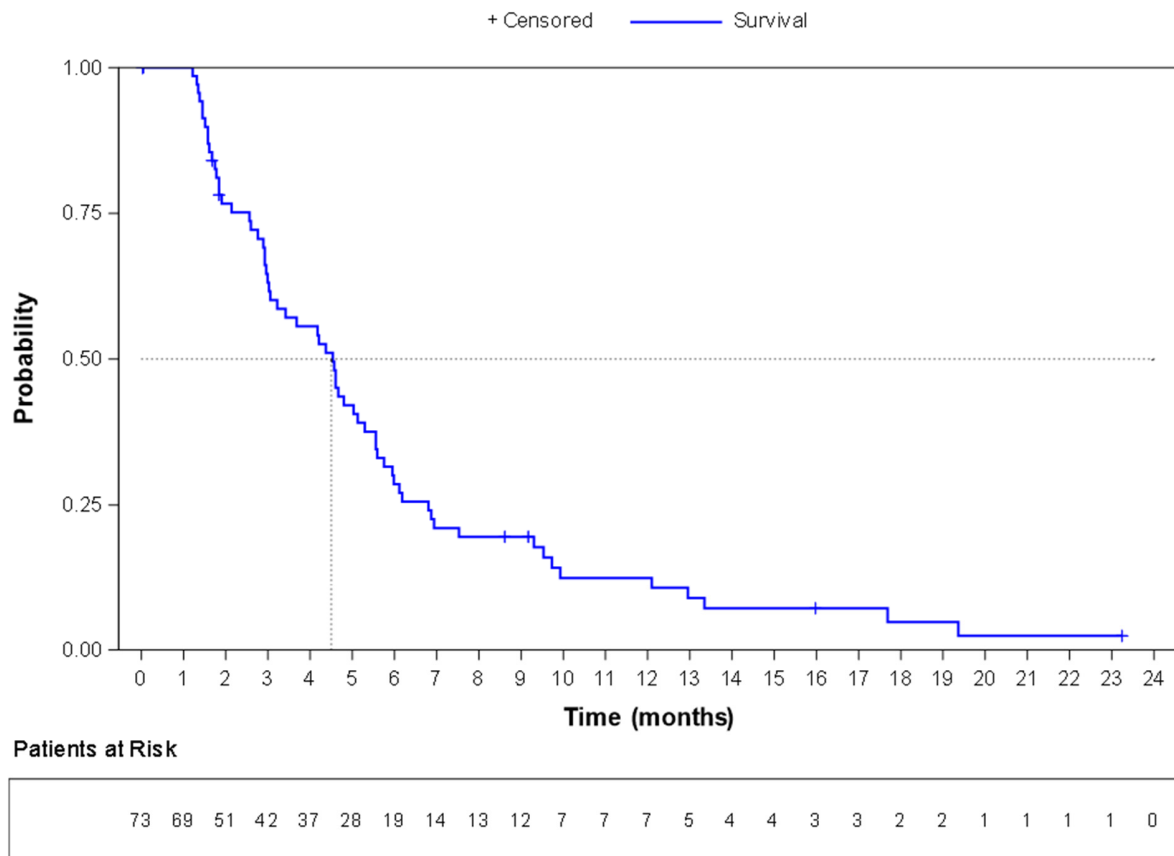

B. Kaplan-Meier curves of progression-free survival according to histology (ovarian vs. endometrium)

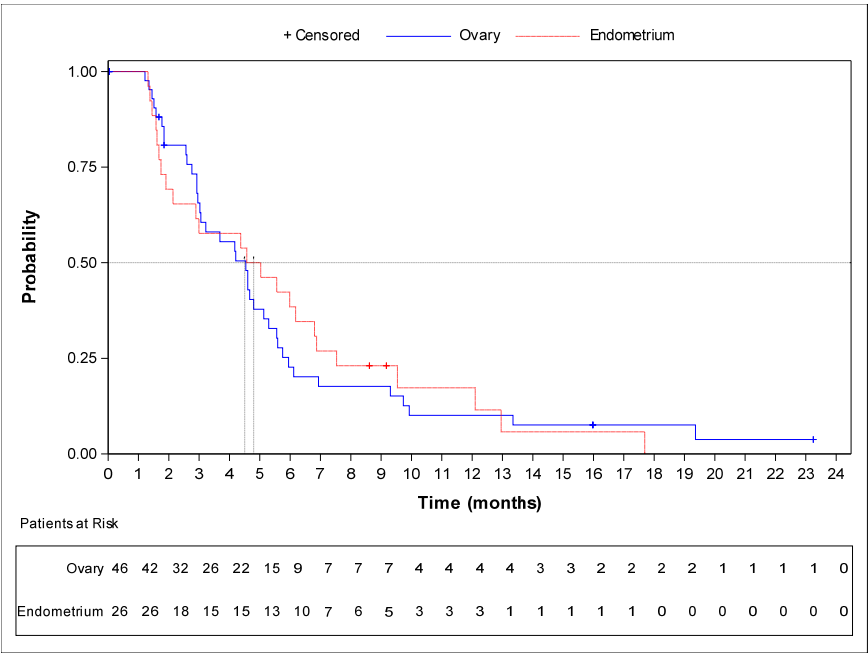

Ovary median PFS 4.5 months (95% CI, 3.0-5.1)  
Endometrium median PFS 4.8 months (95% CI, 1.9-6.8)  
HR 0.97 (CI 95%, 0.56-1.59); p = 0.852

C. Swimmer plot of progression-free survival by tumor type

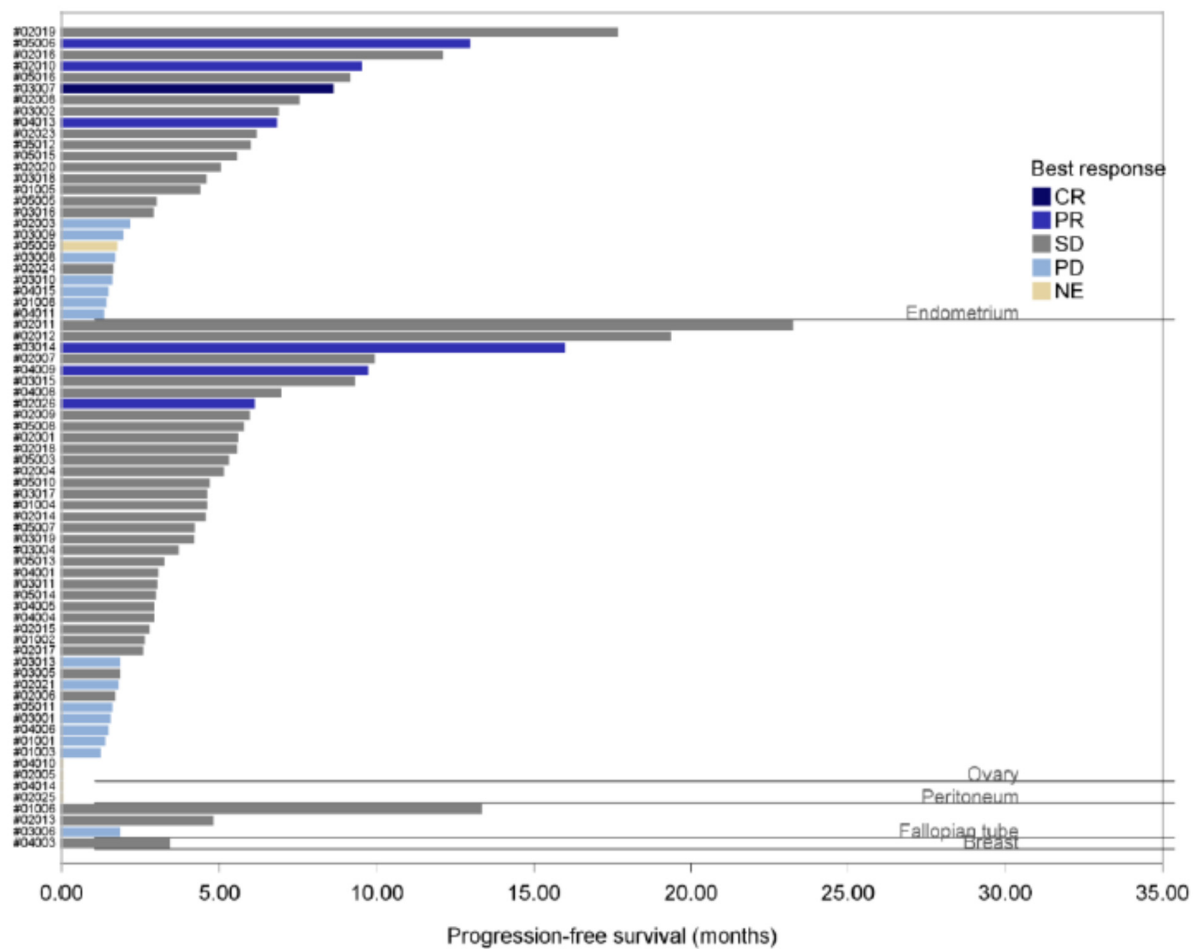

Patients who did not registered RECIST assessment during the study, their PFS was computed as censored at the time of inclusion plus one day.



**Figure S3.**

A. Kaplan-Meier curves of Overall survival for the whole population.

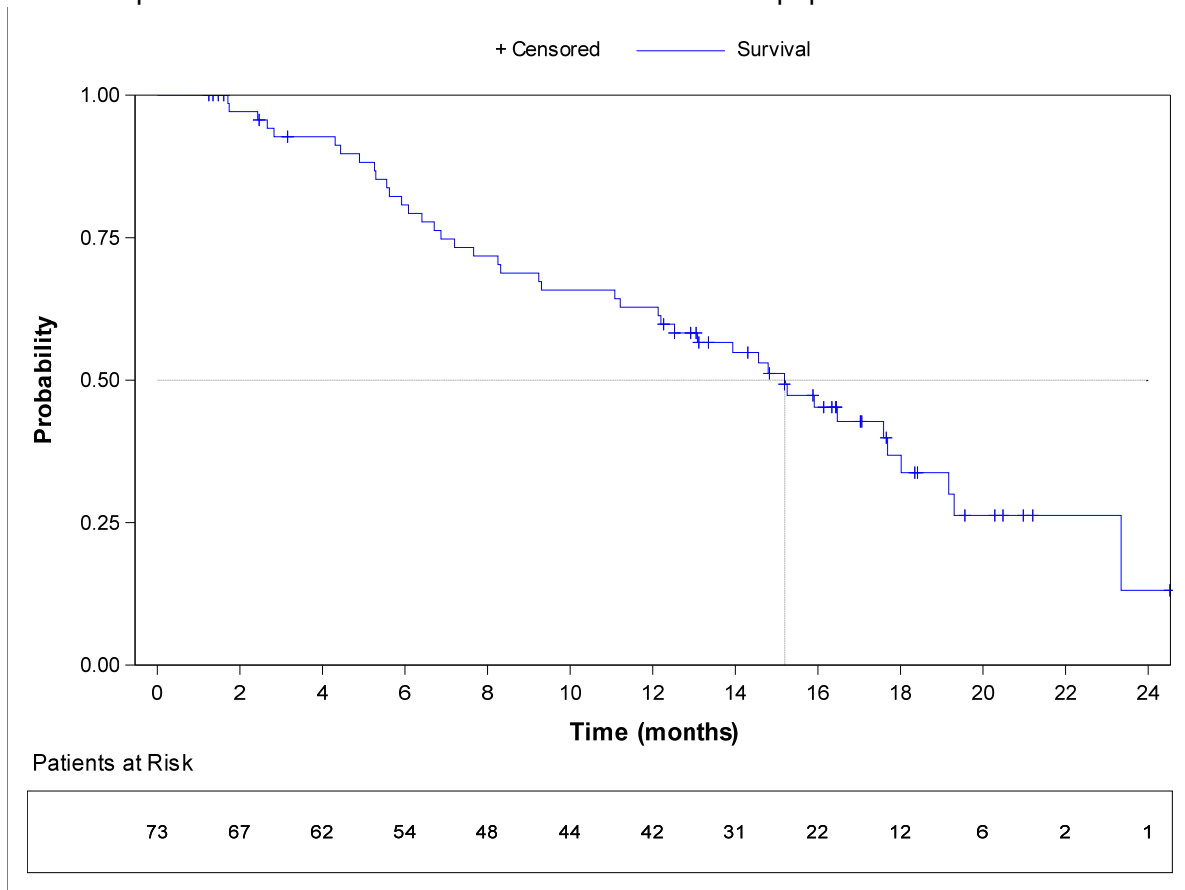

Median OS (95% CI) 15.19 months (12.13, 17.69)

B. Kaplan-Meier curves of Overall survival according to histology (ovarian vs. endometrium)

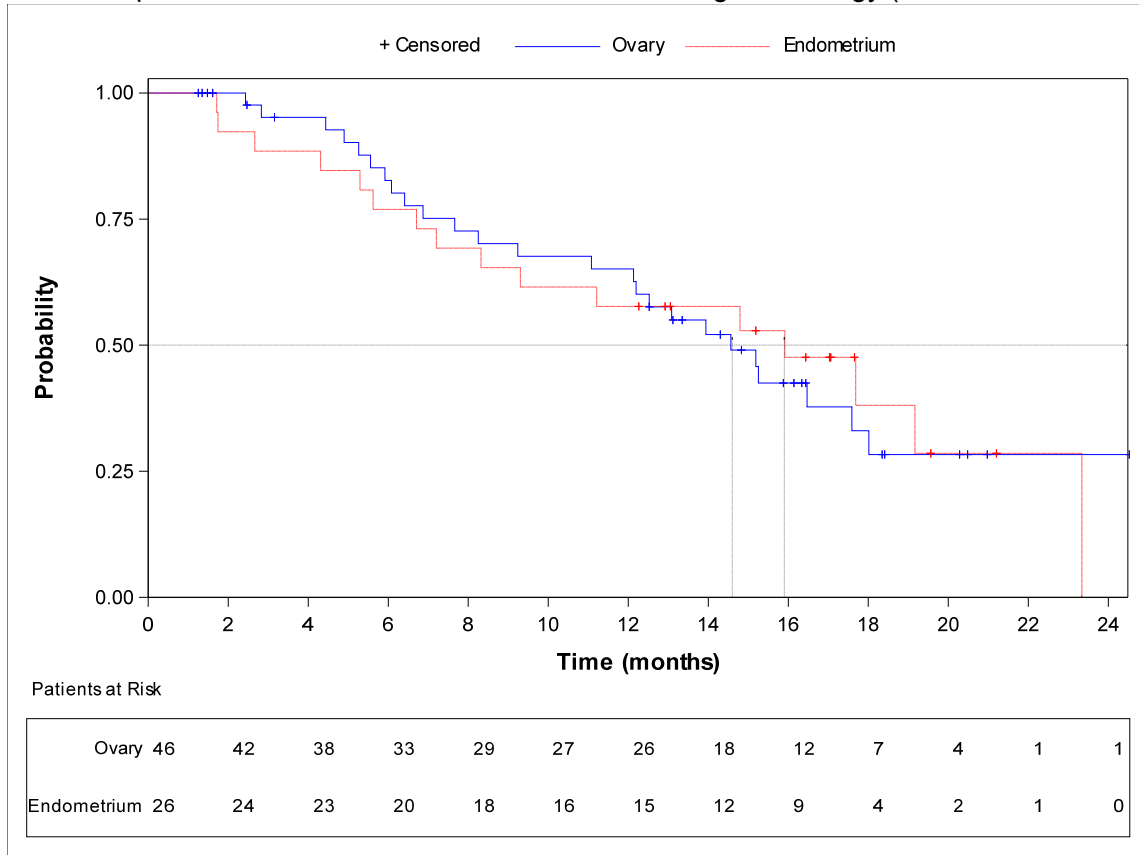

| Strata      | Subjects | Event | % Events | Censored | % Censored | Median | CI 95% LL | CI 95% UL |
|-------------|----------|-------|----------|----------|------------|--------|-----------|-----------|
| Endometrium | 26       | 16    | 61.5     | 10       | 38.5       | 15.9   | 7.2       | 23.3      |
| Ovary       | 46       | 25    | 54.3     | 21       | 45.7       | 14.6   | 11.1      | 17.6      |

*Test of Equality over Strata*

| Test     | Chi-Square | DF | Pr > Chi-Square |
|----------|------------|----|-----------------|
| Log-Rank | 0.0015     | 1  | 0.9688          |

*Cox regression results*

| Contrast         | HR pvalue | HR Estimate | CI 95% LL | CI 95% UL |
|------------------|-----------|-------------|-----------|-----------|
| Endometrium vs 2 | 0.9688    | 0.988       | 0.526     | 1.852     |

**Figure S4:** Comparison of GI patterns between cancer types. A) Total number of events( $d=0.67$ ), B) Total number of gains( $d=0.76$ ), and C) Total number of losses ( $d=0.54$ ),. Non-parametric Wilcoxon Signed Ranks Test was used.

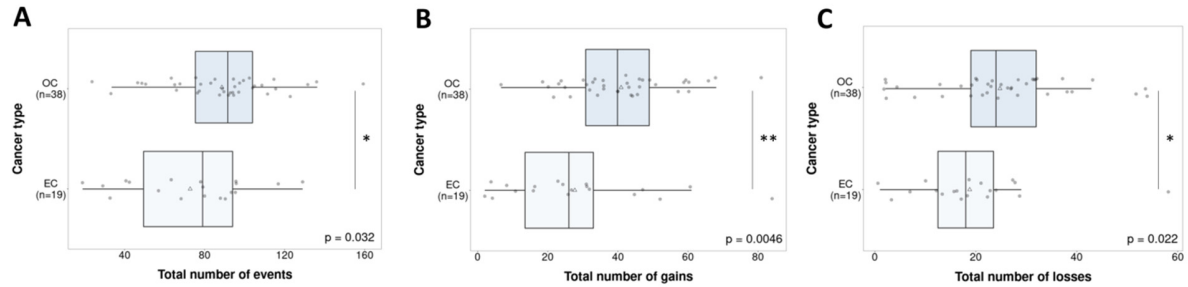

**Figure S5:** Clinical implication of GI parameters regarding ORR in A) Global population ( $d=0.84$ ), B) EC population ( $d=0.34$ ), Non-parametric Wilcoxon Signed Ranks Test was used.

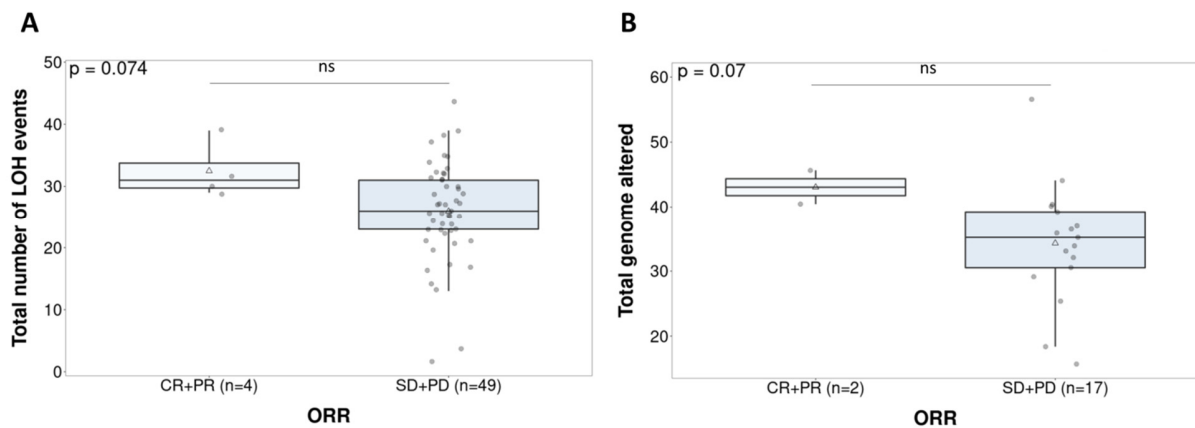

**Figure S6:** Clinical implication of GI parameters in OC population regarding CBR. A) Total number of events ( $d=0.62$ ), and B) total number of gains ( $d=0.69$ ). Non-parametric Wilcoxon Signed Ranks Test was used.

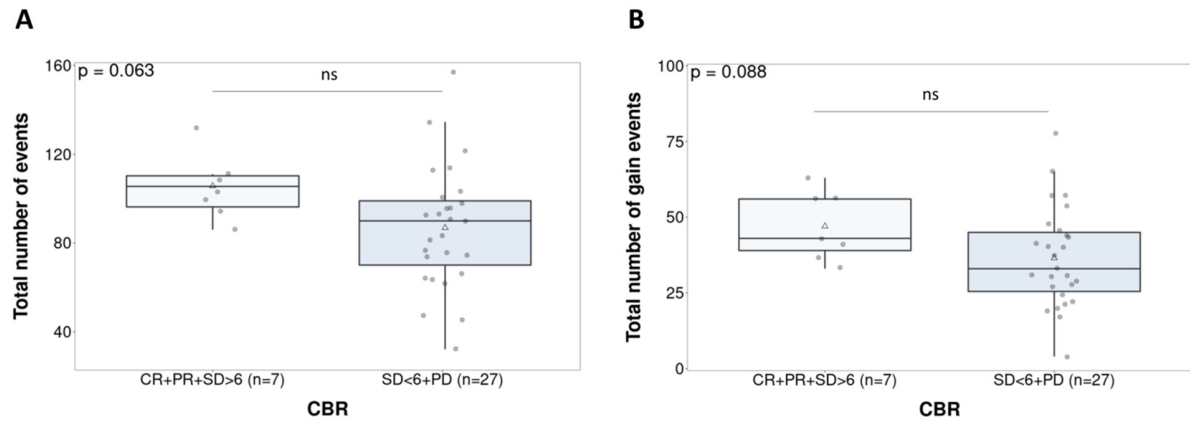

Supplement: s1 [file s1]
